# Supplementary material for: Heterodimerization of TFAP2 pioneer factors drives epigenomic remodeling during neural crest specification
Source: HighWire-hosted journal article supplement (doi:10.1101/gr.249680.119), 2019-12-17
Supplement: Supplemental_Methods_docx.docx [file Supplemental_Methods_docx.docx]

**Supplemental Methods**

*Embryo collection and fixation*

Fertilized chicken eggs (Leghorn White) were purchased from University of Connecticut (Department of Animal Science). Eggs were incubated at 37oC until embryos reached the desired developmental stage. Embryos were collected and cultured according to the EC protocol(Chapman et al., 2001) and staged based on Hamburger and Hamilton(Hamburger and Hamilton, 1951). For immunohistochemistry, embryos were fixed with phosphate buffer (PB) containing 4% PFA for 20 minutes at room temperature and processed immediately. For *in situ* hybridization, embryos were fixed in phosphate buffer saline (PBS) containing 4% paraformaldehyde (PFA) for 2 hours at room temperature or overnight at 4oC. Following fixation, embryos were dissected, washed with PBS + 0.1% Tween-20, dehydrated and stored in methanol at -20oC. Whole-mount *in-situ* hybridization was performed as previously described(Wilkinson, 1992).

*Embryo transfection and perturbation experiments*

Morpholinos/DsiRNAs or DNA expression vectors were injected between the epiblast and vitelline membrane of dissected embryos and electroporated with platinum electrodes (five 50ms pulses of 5.1V, with an interval of 100ms between pulses)(Sauka-Spengler and Barembaum, 2008) . In all gene knockdown and overexpression experiments, the embryos were injected bilaterally with the control reagent on the left side and the targeted reagent on the right side. Following electroporation, embryos were cultured in albumin at 37oC until they reached the desired developmental stages. All embryos were screened to ensure that only uniformly electroporated, healthy embryos were used for further analysis. *TFAP2A* and *TFAP2B* knockdown was performed using DsiRNAs. The control and targeted DsiRNAs (IDT) were injected at a final concentration of 20 μM. *TFAP2C* knockdown was administered using a FITC labeled translation-blocking *morpholino* (GeneTools). Both control and *TFAP2C* morpholinos were injected at a final concentration of 1.5 mM, supplemented with 1μg/μl of carrier DNA and 10mM Tris pH 8.0.

*Immunohistochemistry*

Antibodies used for immunohistochemistry experiments are as follows: anti-AP2 alpha, mouse (DSHB 3B5); anti-AP2 alpha, rabbit monoclonal (abcam, ab108311); anti-AP2 beta, mouse monoclonal (Santa Cruz Biotechnology, sc-390119); anti-AP2 beta, rabbit polyclonal (abcam, ab221094); anti-AP2 gamma, rabbit monoclonal (abcam, ab218107); anti-Pax7, mouse (DSHB AB528428); anti-Sox9, rabbit polyclonal (Millipore Sigma, ab5535); anti-Histone H3(phospho S10), rabbit polyclonal (abcam,ab47297); anti-Caspase3, rabbit polyclonal (R&D Systems, AF835). Secondary antibodies used included donkey anti-mou

se/goat/rabbit IgG conjugated with Alexa Fluor 488/568/647 or goat anti-mouse Alexa 633 (Molecular Probes, 1:3000).

*Primer Sequences for TFAP2AE1 insert*

*TFAP2AE1* forward: TACCACCTCACGCTCGTC

*TFAP2AE1* reverse: TAAAGAACACACGCTCAAGATAAG

*Quantitative reverse transcription PCR (RT-PCR)*

To quantify changes in gene expression caused by perturbation experiments, single neural folds were dissected from the control and targeted side of the embryo, which were subsequently lysed in 50μl lysis buffer from the Power SYBR Green Cells-to-CT Kit (Thermo Fisher Scientific, 4402953). RNA extraction and cDNA preparation were performed according to the kit's protocol. RT-PCR was performed using Power SYBR Green PCR master mix (Thermo Fisher Scientific, 4368577) in an ABI viia7 RT-PCR machine. Expression in whole embryos over time was expressed as fold change compared to the reference gene, *hprt*. For perturbation experiments, Ct values of all genes were normalized to *hprt* and expressed as a fold change compared to the control sample. An unpaired, one sample *t*-test was used to determine significance.

For quantification of gene expression in mcherry+ neural crest cells in control vs *TFAP2AE1:TFAP2B*-expressing embryos, single neural folds were dissected and incubated in Accumax (Accutase, SCR006) cell dissociation solution, for 30 minutes at RT under mild agitation. Mcherry+ cells were then FACS sorted using a BD FACSAria fusion flow cytometer directly into 10μl lysis buffer from the Single Cell-to-CT qRT-PCR Kit (Thermo Fisher Scientific, 4458236). RNA extraction and cDNA preparation were performed according to the kit's protocol. RT-PCR was performed using TaqMan Gene Expression MasterMix (Thermo Fisher Scientific, 4369016) and TaqMan Gene Expression Assays (Thermo Fisher Scientific, 4448892) for chicken *Sox9*, *Snai2*, *Foxd3*, *Ets1*, *Sox10*, and *Hprt* in an ABI viia7 RT-PCR machine. Ct values of all genes were normalized to *hprt* and expressed as a fold change compared to the control sample. An unpaired, one sample *t*-test was used to determine significance.

## *ATAC-seq*

To perform ATAC-seq, cells were centrifuged at 400x g for 10 minutes and resuspended in lysis buffer containing 10 mM Tris-HCl, pH 7.4, 10mM NaCl, 3mM MgCl2, and 0.1? IGEPAL CA-630. Transpostion was performed using the Nextera DNA Library Prep Kit (Illumina, 15028212), using 2.5μl Tn5 transposase and incubating at 37°C for 30 minutes. Quality control of prepared libraries was conducted using an ABI 3730xl DNA Analyzer for fragment analysis. Libraries were pooled to equimolar concentrations using the KAPA Library Quant Kit (illumina) ROX Low qPCR Mix (Roche, 07960336001) and sequenced with paired-end 37bp reads on an Illumina NextSeq 500 instrument.

*ATAC-seq data analysis*

In processing ATAC-seq data, paired-end sequencing reads were trimmed using Cutadapt(Martin, 2011) and aligned to the reference chicken galGal5 assembly using Bowtie 2(Langmead and Salzberg, 2012). Picard MarkDuplicates tool was used to mark duplicate reads and BAM files were filtered with SAMtools(Li et al., 2009) to discard unmapped reads, those which were not the primary alignment, reads failing platform/vendor quality checks, and PCR/optical duplicates (-f 2 -F 1804). Heatmaps were generated using deepTools2 plotHeatmap function (Ramirez et al., 2016) and profiles were generated using fluff’s profile function (Georgiou and van Heeringen, 2016).

## *CUT&RUN*

Antibodies used for CUT&RUN experiments are as follows: Antibodies used for CUT&RUN experiments are as follows: anti-AP2 alpha, rabbit monoclonal (abcam, ab108311); anti-AP2 beta, rabbit polyclonal (abcam, ab221094); anti-AP2 gamma, rabbit monoclonal (abcam, ab218107); anti-Histone H3 (acetyl K27), rabbit monoclonal (abcam, ab177178); anti-IgG H&L, rabbit (abcam, ab46540).

*CUT&RUN data analysis*

In processing CUT&RUN data, paired-end sequencing reads were trimmed using Cutadapt(Martin, 2011). Reads were filtered for those with a minimum length of 25bp or longer and aligned to the reference chicken galGal5 assembly using Bowtie 2(Langmead and Salzberg, 2012). Picard MarkDuplicates tool was used to mark duplicate reads and BAM files were filtered with SAMtools to discard unmapped reads, those which were not the primary alignment, reads failing platform/vendor quality checks, and PCR/optical duplicates (-f 2 -F 1804). Peak calling was performed using MACS version 2.1(Zhang et al., 2008) with a p value cutoff of 0.001. Peaks were annotated by assigning the closest expressed gene (genes receiving at least one count in two or more samples as determined via RNA-seq) using BEDTools closest function and filtered for those within 10kb. Heatmaps were generated using deepTools2 plotHeatmap function (Ramirez et al., 2016) and profiles were generated using fluff’s profile function (Georgiou and van Heeringen, 2016). Motif enrichment analysis was performed using the MEME motif suite’s (Bailey et al., 2009) MEME-ChIP function on 1000bp sequences flanking the summit of each peak. Methodology for the CUT&RUN differential binding analysis is described in the Supplementary Methods.

*CUT&RUN differential binding analysis*

Differential binding analysis of TFAP2A occupancy was performed on a master set of 85837 peaks obtained from the H3K27ac and TFAP2A CUT&RUN peak sets using DiffBind (Ross-Innes et al., 2012). Significantly enriched peaks at HH6 vs HH9 were filtered to those with a fold change greater than or less than 2 and an FDR less than 0.05.

## *RNA-seq* data analysis

## RNA-seq reads were trimmed using Cutadapt(Martin, 2011) to remove adaptor sequences. Reads were then aligned to the chicken reference genome galGal5 using HISAT2(Kim et al., 2019). Read counts were obtained using featureCounts(Liao et al., 2014). Differential gene expression analysis was performed using DESeq2 (Love et al., 2014).

*Enhancer mutations and flow cytometry analysis*

Putative enhancer elements were narrowed down to 500-600bp fragments flanking the TFAP2A binding motif (predicted via JASPAR(Fornes et al., 2019)) and cloned into ptk eGFP(Uchikawa et al., 2003), such that enhancer activity drives GFP expression. All enhancer sequences were PCR amplified from a chicken gDNA library. To identify putative cofactor binding sites, the 500-600bp sequences were submitted to JASPAR and sites matching the motifs of predicted cofactors (as determined via MEME-ChIP) were chosen for mutational analysis. Binding sites were mutated to poly ‘gc’ sequences and mutated enhancers were cloned into ptk eGFP. Enhancer activity was quantitatively measured by co-electroporating control or mutated enhancer constructs with the *TFAP2AE1-mCherry* reporter vector. For flow cytometry analysis, whole embryos were dissected and incubated in Accumax (Accutase, SCR006) cell dissociation solution for 40 minutes at RT under mild agitation. Analysis was performed on an Attune NxT Flow Cytometer (Thermo Fisher Scientific), measuring the mCherry and GFP fluorescence intensity of each sample. GFP fluorescence intensity within the mCherry+ population for control vs mutant enhancers was plotted to compare enhancer activity within the neural crest cell population for each enhancer analyzed.

*Proximity ligation assays*

Primary antibody pairs used for proximity ligation assays are as follows: anti-AP2 alpha(3B5), mouse (DSHB AB2313948)/ anti-AP2 gamma, rabbit monoclonal (abcam, ab218107), anti-AP2 alpha, mouse (DSHB 3B5)/ anti-AP2 beta, rabbit polyclonal (abcam, ab221094), anti-AP2 alpha, rabbit monoclonal (abcam, ab108311)/ anti-MSX1/2, mouse (DSHB 4G1), and anti-AP2 alpha, rabbit monoclonal (abcam, ab108311)/ anti-p300, mouse (Santa Cruz Biotechnology sc-48343).

Bailey, T.L., Boden, M., Buske, F.A., Frith, M., Grant, C.E., Clementi, L., Ren, J., Li, W.W., and Noble, W.S. (2009). MEME SUITE: tools for motif discovery and searching. Nucleic Acids Res *37*, W202-208.

Chapman, S.C., Collignon, J., Schoenwolf, G.C., and Lumsden, A. (2001). Improved method for chick whole-embryo culture using a filter paper carrier. Dev Dyn *220*, 284-289.

Fornes, O., Castro-Mondragon, J.A., Khan, A., van der Lee, R., Zhang, X., Richmond, P.A., Modi, B.P., Correard, S., Gheorghe, M., Baranasic, D.*, et al.* (2019). JASPAR 2020: update of the open-access database of transcription factor binding profiles. Nucleic Acids Res.

Georgiou, G., and van Heeringen, S.J. (2016). fluff: exploratory analysis and visualization of high-throughput sequencing data. PeerJ *4*, e2209.

Hamburger, V., and Hamilton, H.L. (1951). A series of normal stages in the development of the chick embryo. J Morphol *88*, 49-92.

Kim, D., Paggi, J.M., Park, C., Bennett, C., and Salzberg, S.L. (2019). Graph-based genome alignment and genotyping with HISAT2 and HISAT-genotype. Nat Biotechnol *37*, 907-915.

Langmead, B., and Salzberg, S.L. (2012). Fast gapped-read alignment with Bowtie 2. Nat Methods *9*, 357-359.

Li, H., Handsaker, B., Wysoker, A., Fennell, T., Ruan, J., Homer, N., Marth, G., Abecasis, G., Durbin, R., and Genome Project Data Processing, S. (2009). The Sequence Alignment/Map format and SAMtools. Bioinformatics *25*, 2078-2079.

Liao, Y., Smyth, G.K., and Shi, W. (2014). featureCounts: an efficient general purpose program for assigning sequence reads to genomic features. Bioinformatics *30*, 923-930.

Love, M.I., Huber, W., and Anders, S. (2014). Moderated estimation of fold change and dispersion for RNA-seq data with DESeq2. Genome Biol *15*, 550.

Martin, M. (2011). Cutadapt removes adapter sequences from high-throughput sequencing reads. EMBnetjournal *17*, 10-12.

Ramirez, F., Ryan, D.P., Gruning, B., Bhardwaj, V., Kilpert, F., Richter, A.S., Heyne, S., Dundar, F., and Manke, T. (2016). deepTools2: a next generation web server for deep-sequencing data analysis. Nucleic Acids Res *44*, W160-165.

Ross-Innes, C.S., Stark, R., Teschendorff, A.E., Holmes, K.A., Ali, H.R., Dunning, M.J., Brown, G.D., Gojis, O., Ellis, I.O., Green, A.R.*, et al.* (2012). Differential oestrogen receptor binding is associated with clinical outcome in breast cancer. Nature *481*, 389-393.

Sauka-Spengler, T., and Barembaum, M. (2008). Gain- and loss-of-function approaches in the chick embryo. Methods Cell Biol *87*, 237-256.

Uchikawa, M., Ishida, Y., Takemoto, T., Kamachi, Y., and Kondoh, H. (2003). Functional analysis of chicken Sox2 enhancers highlights an array of diverse regulatory elements that are conserved in mammals. Dev Cell *4*, 509-519.

Wilkinson, D.G. (1992). In situ hybridization : a practical approach (Oxford ; New York: IRL Press at Oxford University Press).

Zhang, Y., Liu, T., Meyer, C.A., Eeckhoute, J., Johnson, D.S., Bernstein, B.E., Nusbaum, C., Myers, R.M., Brown, M., Li, W.*, et al.* (2008). Model-based analysis of ChIP-Seq (MACS). Genome Biol *9*, R137.
