# Supplementary material for: Heterodimerization of TFAP2 pioneer factors drives epigenomic remodeling during neural crest specification
Source: HighWire-hosted journal article supplement (doi:10.1101/gr.249680.119), 2019-12-17
Supplement: Supplemental_Table_S6.xlsx [file Supplemental_Table_S6.xlsx]

## Sheet: Table S6
Table S6. Coordinates of putative enhancers dynamically regulated by TFAP2A
Genomic coordinates and primer sequences used to amplify putative enhancers regulated by dynamic TFAP2A peaks, as reported in Figure S3. The closest genes flanking each peak tested in both the 5' and 3' direction are also listed.
Enhancer ID	location	forward primer	reverse primer	Closest 5' annotated gene	Closest 3' annotated gene
E6.1	chr2:51181257-51181919	CAGCCATGGGATATCTGGA	CCCCGTCTCTTTCAGCCTAT	GLI3	PSMA2
E6.2	chr9:12,008,169-12,008,907	AATTCTTATCTCTAAGACAGGCTCCA	CTTAATTGAAAATAAATTCTCTGAACC	ZIC1	mir-6611
E6.3	chr5:11620538-11621699	TCTTTGCAAACAACTGCTTTT	TCAAACATTAGATTAGCCTCACCTT	PLEKHA7	RPS13
E6.4	chr4:49867355-49868835	GGGAGCCTCAGAGCGAAG	CTCGTGGGCCGAAACAAG	ERI1	PPP1R3B
E6.5	chr7:14186529-14186962	GCTTTCCATCAGTGCTAGGC	GTTTTGGCTGTTGGTGATGG	PPP1R1C	SSFA2
E6.6	chr1:76182938-76183662	AGTAATATGGCTTGTTATTGGGAAA	TGGCTTATGTGTGGGAATCA	A2ML2	PHC1
E6.7	chr11:5994288-5998540	AACAGATCCACCGCAAAAA	TCAGTTTTCTTCACTTTGAATTTCC	TOX3	SALL1
E9.1	chr3:41983956-41984264	CCTTTTCCATAGCCCAAGTG	GGATATATACAACAAAGTAGCTTGTGC	SULT	DACT2
E9.2	chr12:14489881-14491262	AGGCATCACAGCGTAACTCC	GGGTTGTGTTCTGCCAAACT	LRIG1	KBTBD8
E9.3	chr2:108574341-108577906	AGCAGCCAGGTAGGGATCG	AAATCCCTTCAGAAACACTTCC	UBE2V2	SNAI2
E9.4	chr2:30348223-30349037	TTCCTTCGCCTGTTTCTCC	TGTGAAAGAAGTTCTGTGAGCTG	SP8	SP4
E9.5	chr2:59043416-59048745	ACACAAGGAGACTAAGGGTGGA	CTGTTCTCCTCTATAAGAGGCTGTTT	PRL	SOX4
E9.6	chr5:2049532-2049932	GCAGAGCCAGCATCAGAAAT	TGTGAGTAAGGGGCTCAAATG	DBX1	PRMT3
E9.7	chr8:15845001-15847000	ACAGCAGTGAGCATCACAGTA	GCTTTTCAAAACATTCAAGCTG	LMO4	HS2ST1
